# Supplementary material
Source: PubMed Central journal article supplement (PMC6743845)

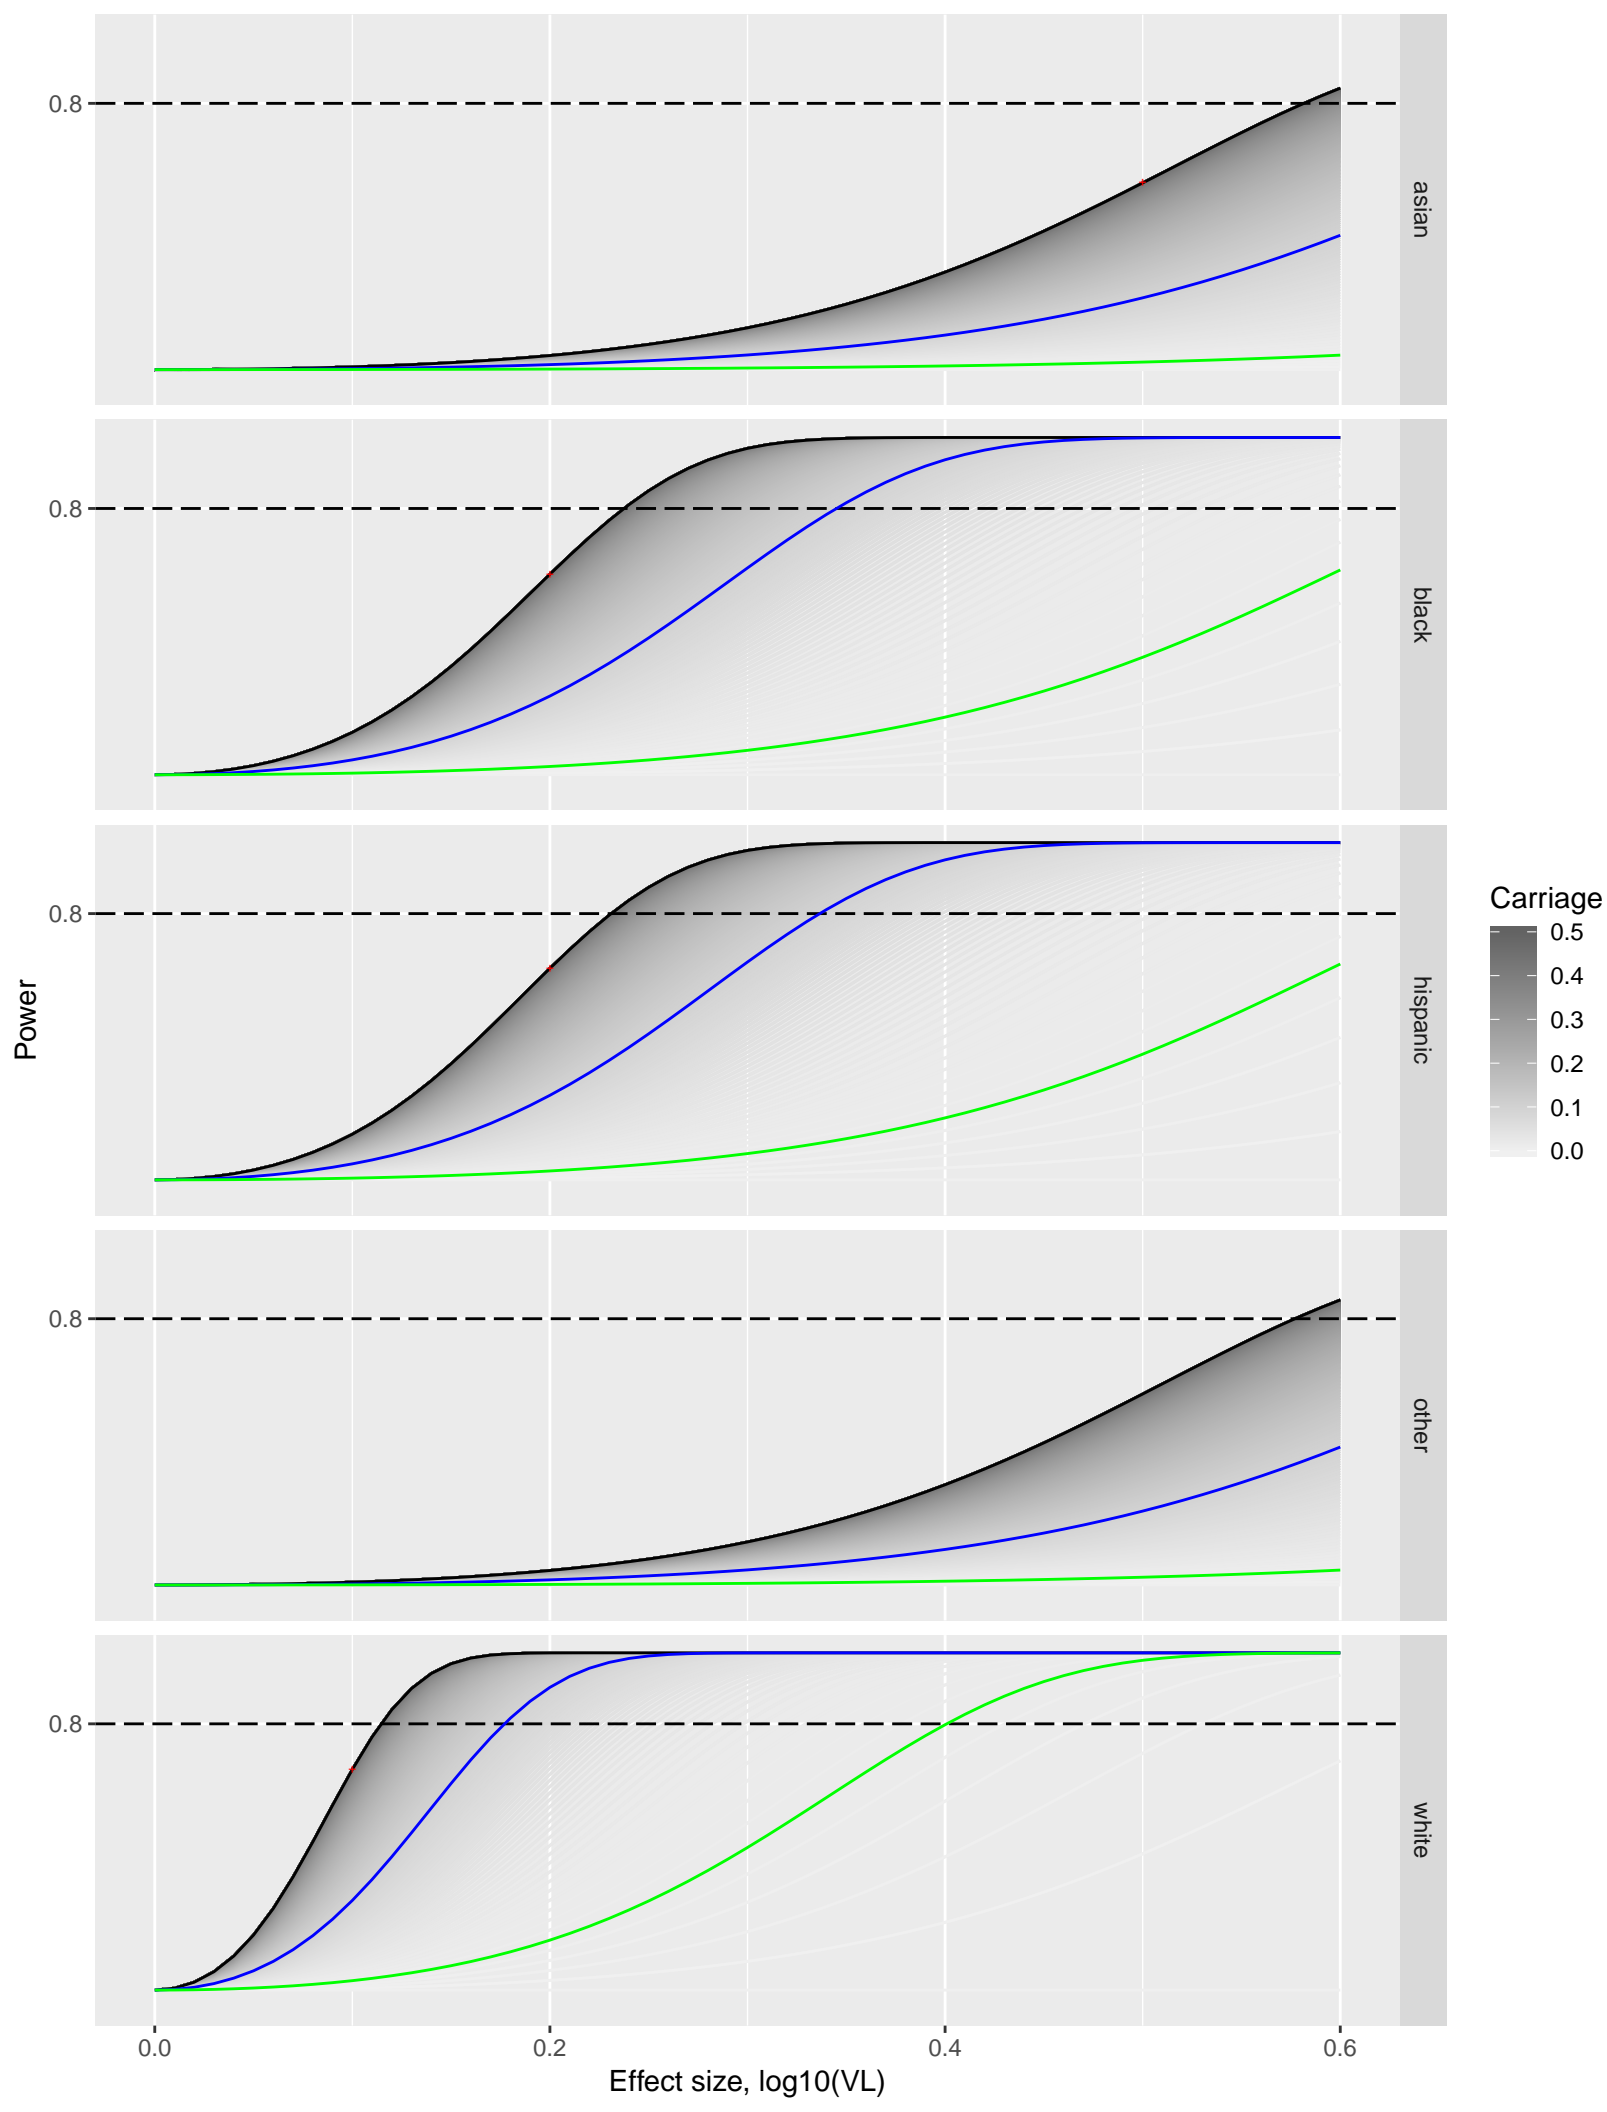

Supplement: jiz294_suppl_supplementary_figure-s4.pdf [file jiz294_suppl_supplementary_figure-s4.pdf]
